# Supplementary material
Source: MDPI journal article supplement (https://www.mdpi.com/2673-8392/3/1/21)
Supplement: s1 [file s1 › encyclopedia-2227636-supplementary.pdf]

# Supplementary Materials

## 1. Supplementary Tables

**Table S1.** Cell surface marker panel for FE002 primary progenitor tenocytes following in vitro monolayer expansion in various incubation atmospheres. CD, cluster of differentiation; FITC, fluorescein isothiocyanate; HLA; human leucocyte antigen; PE, phycoerythrin. Adapted from [28].

| Cell Surface Marker | Antibody Used for Characterization                                          | Surface Marker Expression in Normoxic <sup>1</sup> Monolayer Culture | Surface Marker Expression in Hypoxic <sup>2</sup> Monolayer Culture |
|---------------------|-----------------------------------------------------------------------------|----------------------------------------------------------------------|---------------------------------------------------------------------|
| CD14                | FITC Mouse Anti-Human CD14                                                  | -                                                                    | -                                                                   |
| CD19                | PE Mouse Anti-Human CD19                                                    | -                                                                    | -                                                                   |
| CD26                | PE Mouse Anti-Human CD26                                                    | +                                                                    | +                                                                   |
| CD34                | PE Mouse Anti-Human CD34                                                    | -                                                                    | -                                                                   |
| CD44                | PE Mouse Anti-Human CD44                                                    | +                                                                    | +                                                                   |
| CD45                | FITC Mouse Anti-Human CD45                                                  | -                                                                    | -                                                                   |
| CD73                | PE Mouse Anti-Human CD73                                                    | +                                                                    | +                                                                   |
| CD90                | PE Mouse Anti-Human CD90                                                    | +                                                                    | +                                                                   |
| CD105               | PE Mouse Anti-Human CD105                                                   | +                                                                    | +                                                                   |
| CD166               | PE Mouse Anti-Human CD166                                                   | +                                                                    | +                                                                   |
| HLA-ABC             | PE Mouse Anti-Human HLA-ABC                                                 | +                                                                    | +                                                                   |
| HLA-DPQR            | FITC Mouse Anti-Human HLA-DR <sub>β</sub> -DP <sub>β</sub> -DQ <sub>β</sub> | -                                                                    | -                                                                   |

<sup>1</sup> Normoxic culture conditions consisted in an incubation atmosphere composed of 5% CO<sub>2</sub> and 21% O<sub>2</sub>. <sup>2</sup> Hypoxic culture conditions consisted in an incubation atmosphere composed of 5% CO<sub>2</sub> and 2% O<sub>2</sub>.

**Table S2.** Experimental assessment of the differentiation potential of FE002 primary progenitor tenocytes in vitro under chemical induction during adherent cell culture. Adipose-derived stem cells were used as experimental positive controls in the differentiation assays. DMEM, Dulbecco's Modified Eagle Medium; FBS, fetal bovine serum; HPL, human platelet lysate; ITS, insulin-transferrin-selenium. Adapted from [28].

| Differentiation Assay Type | Chemical Induction Medium                                                                                             | Readout                               | Differentiation Result in Normoxic <sup>1</sup> Culture | Differentiation Result in Hypoxic <sup>2</sup> Culture |
|----------------------------|-----------------------------------------------------------------------------------------------------------------------|---------------------------------------|---------------------------------------------------------|--------------------------------------------------------|
| Adipogenic Culture         | High-glucose DMEM; 10% <i>v/v</i> FBS; 2 mM L-glutamine; ITS 1×; 1 μM dexamethasone; 100 μM indomethacin; 100 μM IBMX | Oil Red O stain                       | -                                                       | -                                                      |
| Osteogenic Culture         | High-glucose DMEM; 5% <i>v/v</i> HPL; 80 μg/mL VitCp; 5 mM β-glycerophosphate; 100 nM dexamethasone                   | Alizarin Red stain<br>Von Kossa stain | -<br>-                                                  | -<br>-                                                 |

<sup>1</sup> Normoxic culture conditions consisted in an incubation atmosphere composed of 5% CO<sub>2</sub> and 21% O<sub>2</sub>. <sup>2</sup> Hypoxic culture conditions consisted in an incubation atmosphere composed of 5% CO<sub>2</sub> and 2% O<sub>2</sub>.

## 2. Supplementary Figures

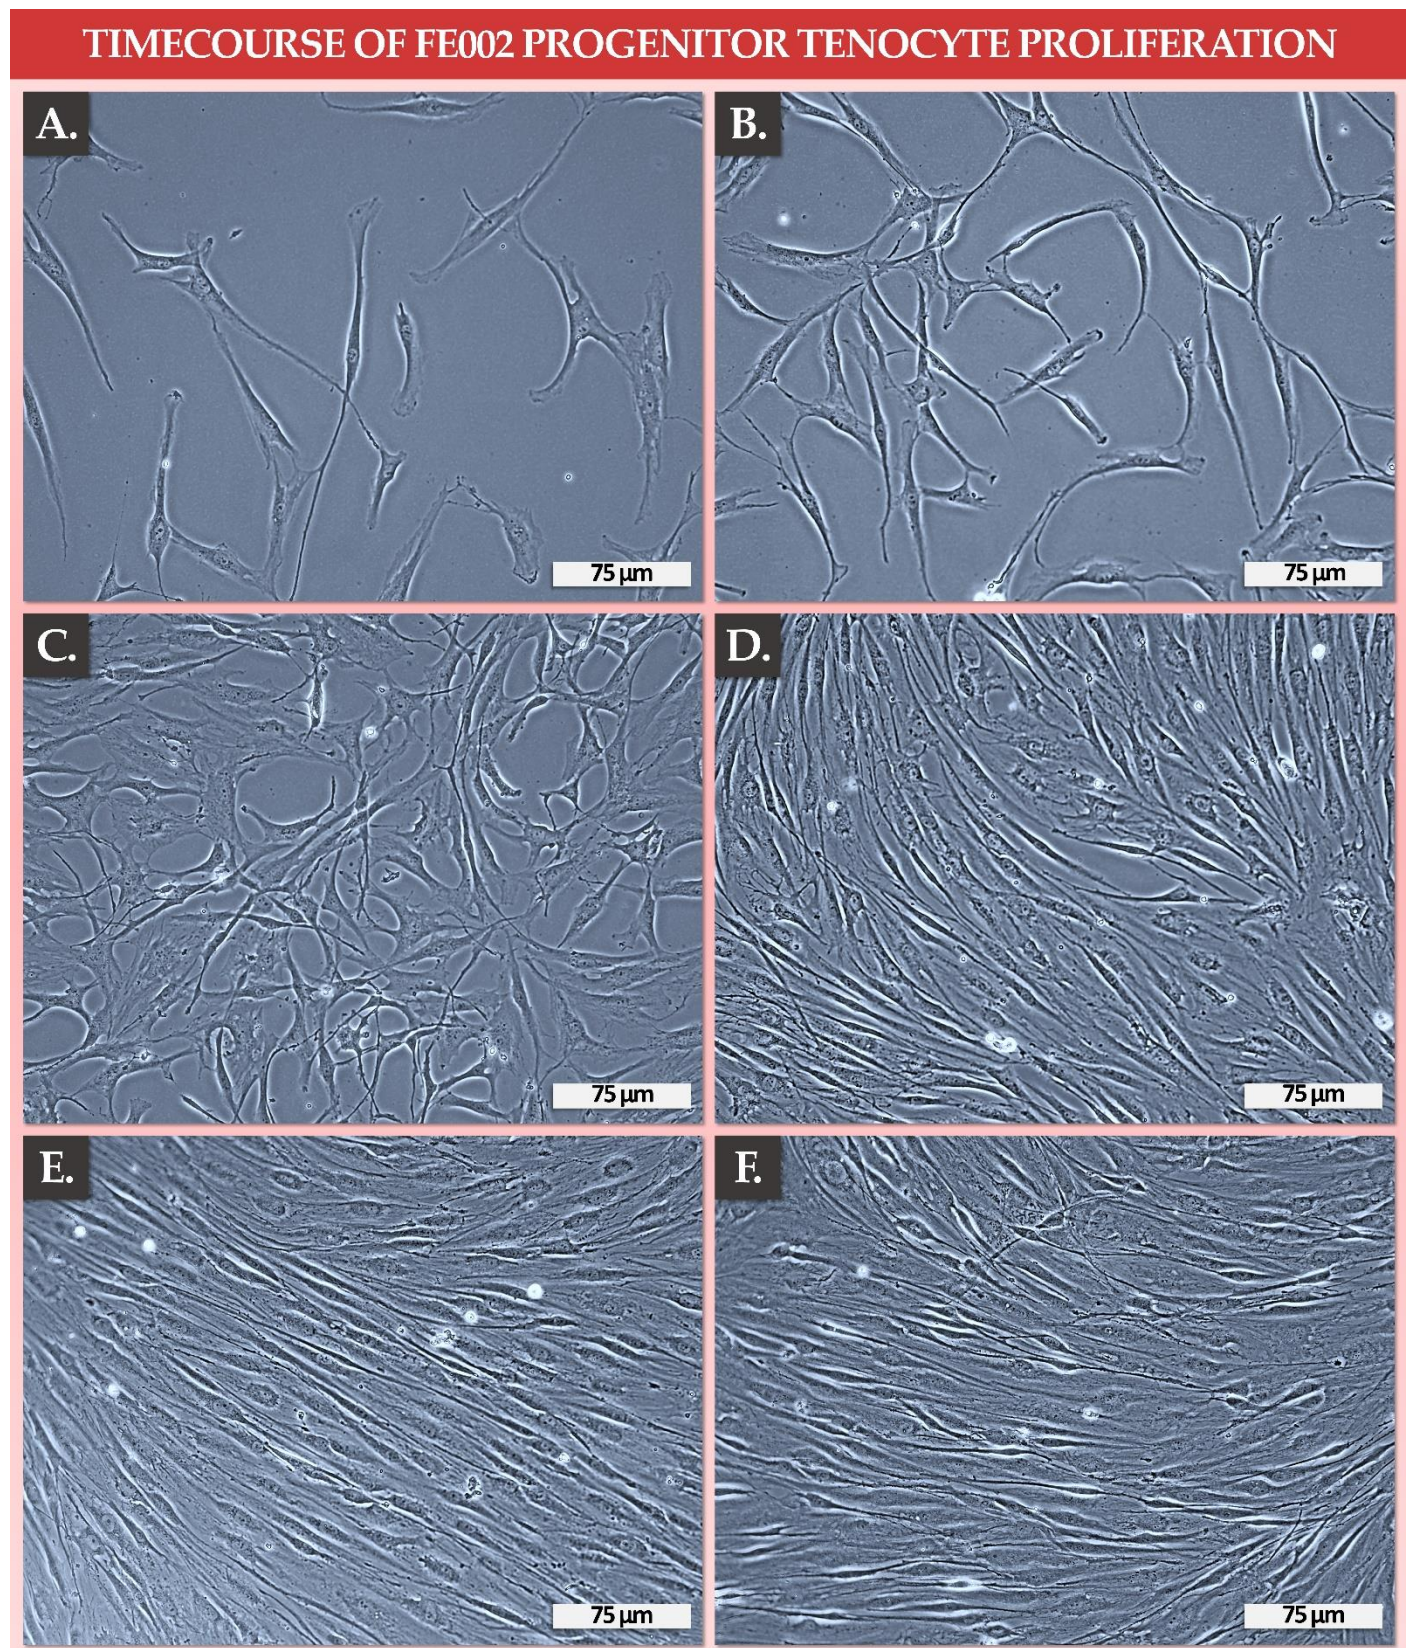

**Figure S1.** Illustrative timecourse of human primary progenitor tenocyte (e.g., FE002-Ten cells, passage level 6) in vitro expansion. Photographs were taken in microscopy at the time of culture medium exchange. Proliferating cells after 2 days of culture (A), after 5 days of culture (B), after 7 days of culture (C), after 9 days of culture (D), after 12 days of culture (E), and after 14 days of culture (F). Scale bars = 75 µm.
